# Supplementary material for: Phase I Study of a Multivalent WT1 Peptide Vaccine (Galinpepimut-S) in Combination with Nivolumab in Patients with WT1-Expressing Ovarian Cancer in Second or Third Remission
Source: MDPI journal article supplement (doi:10.3390/cancers15051458), 2023-02-25
Supplement: s1 [file s1]

# Treatment Timeline

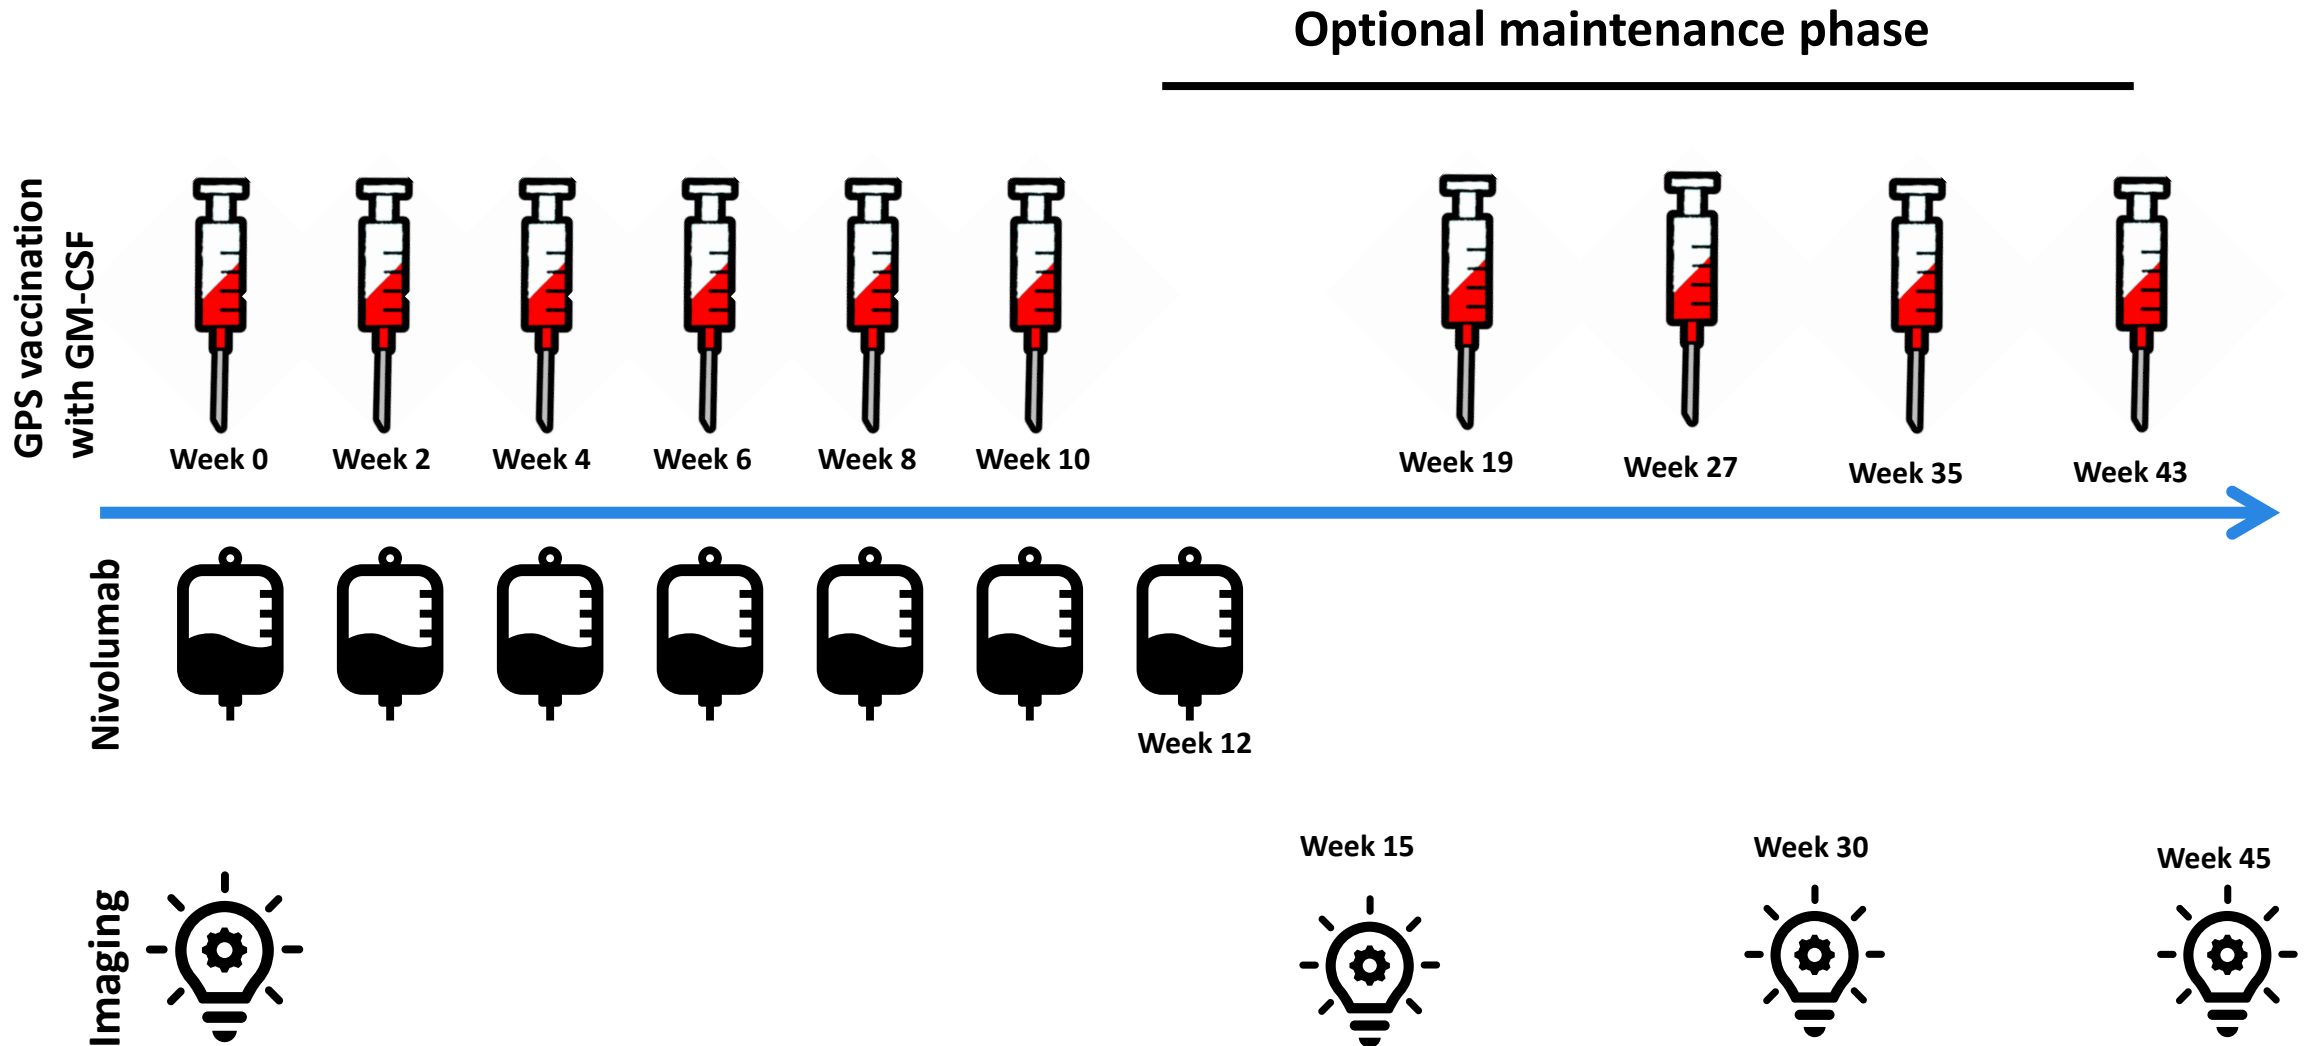

Figure S1: Treatment timeline. GPS, galinpepimut-S; GM-CSF, granulocyte-macrophage colony-stimulating factor

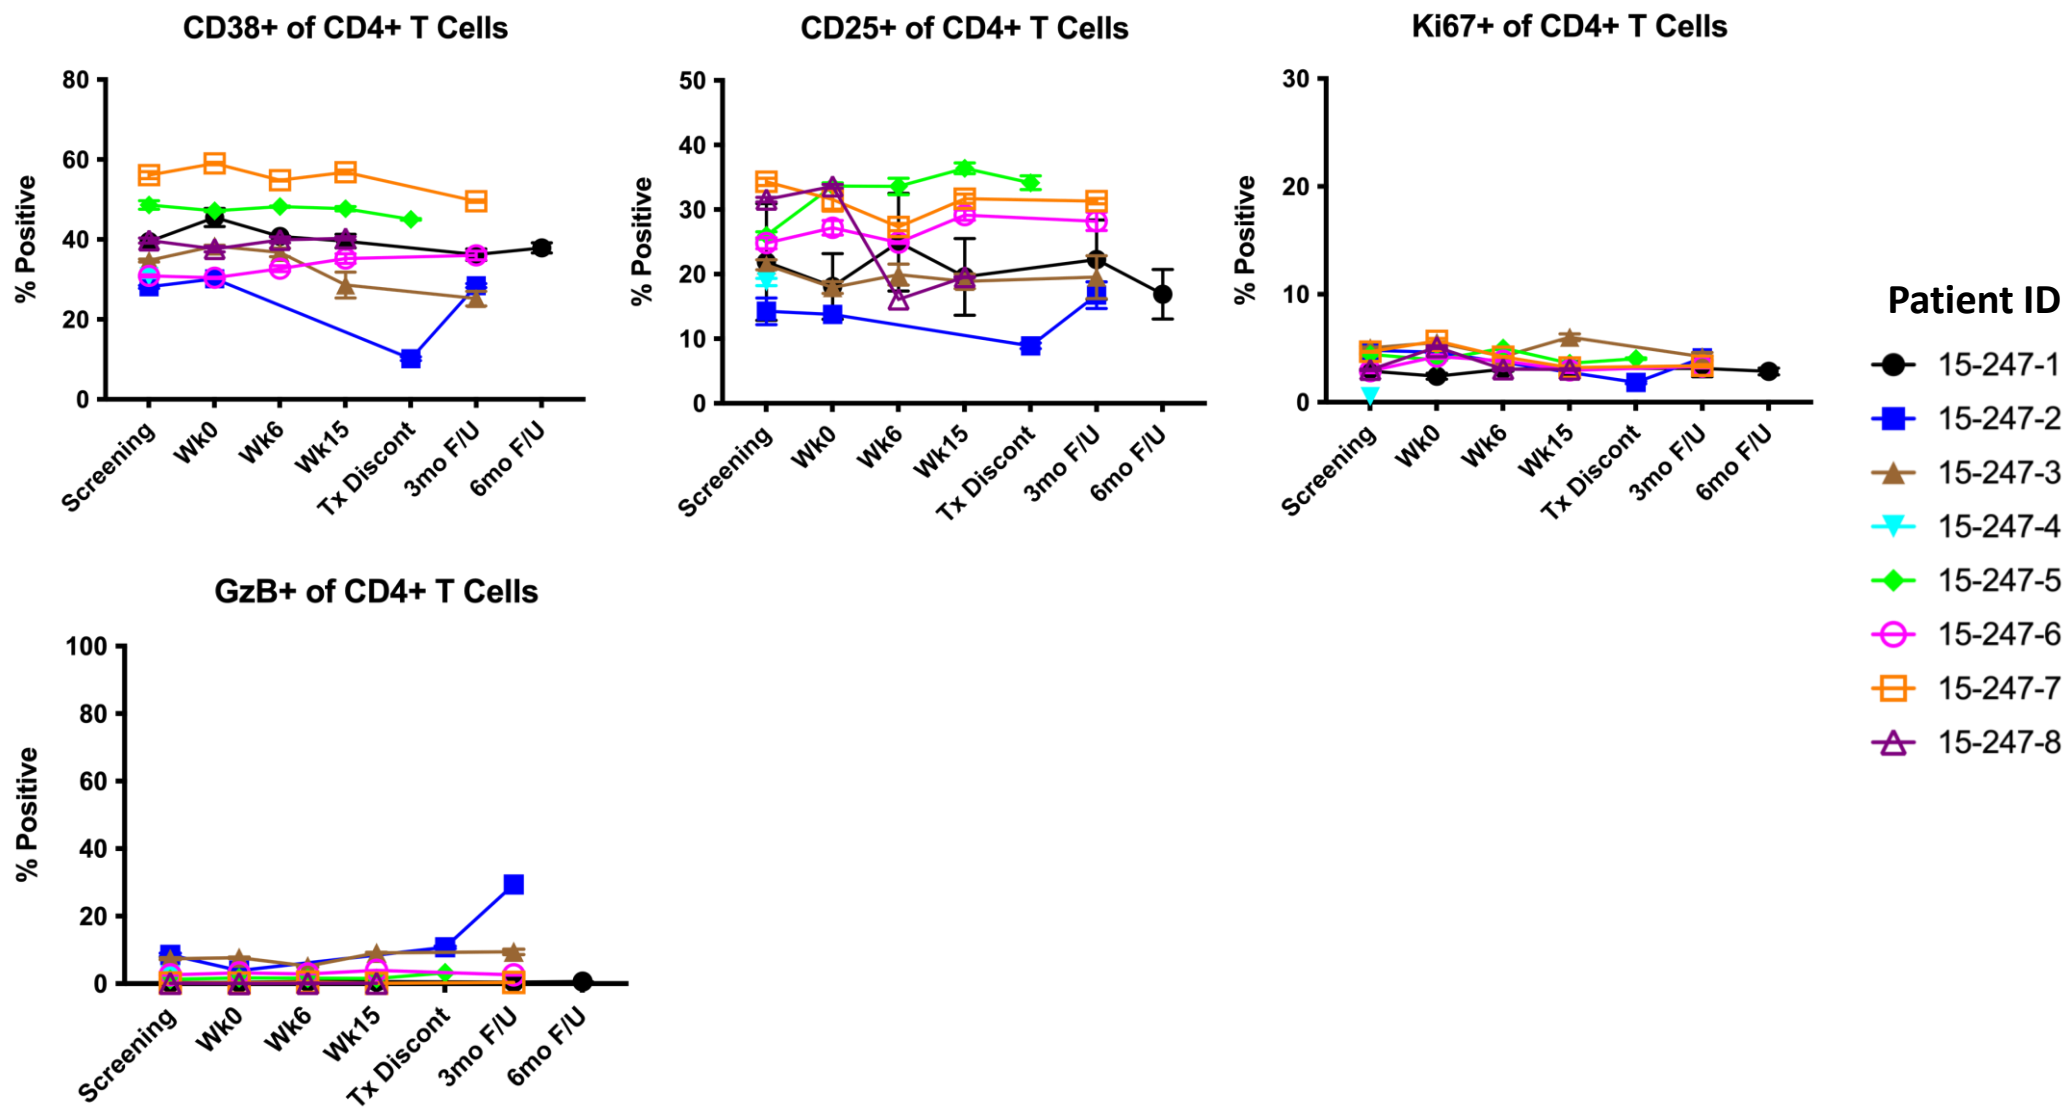

Figure S2: Summary of CD4+ cell subpopulation frequencies over time

GzB, Granzyme B

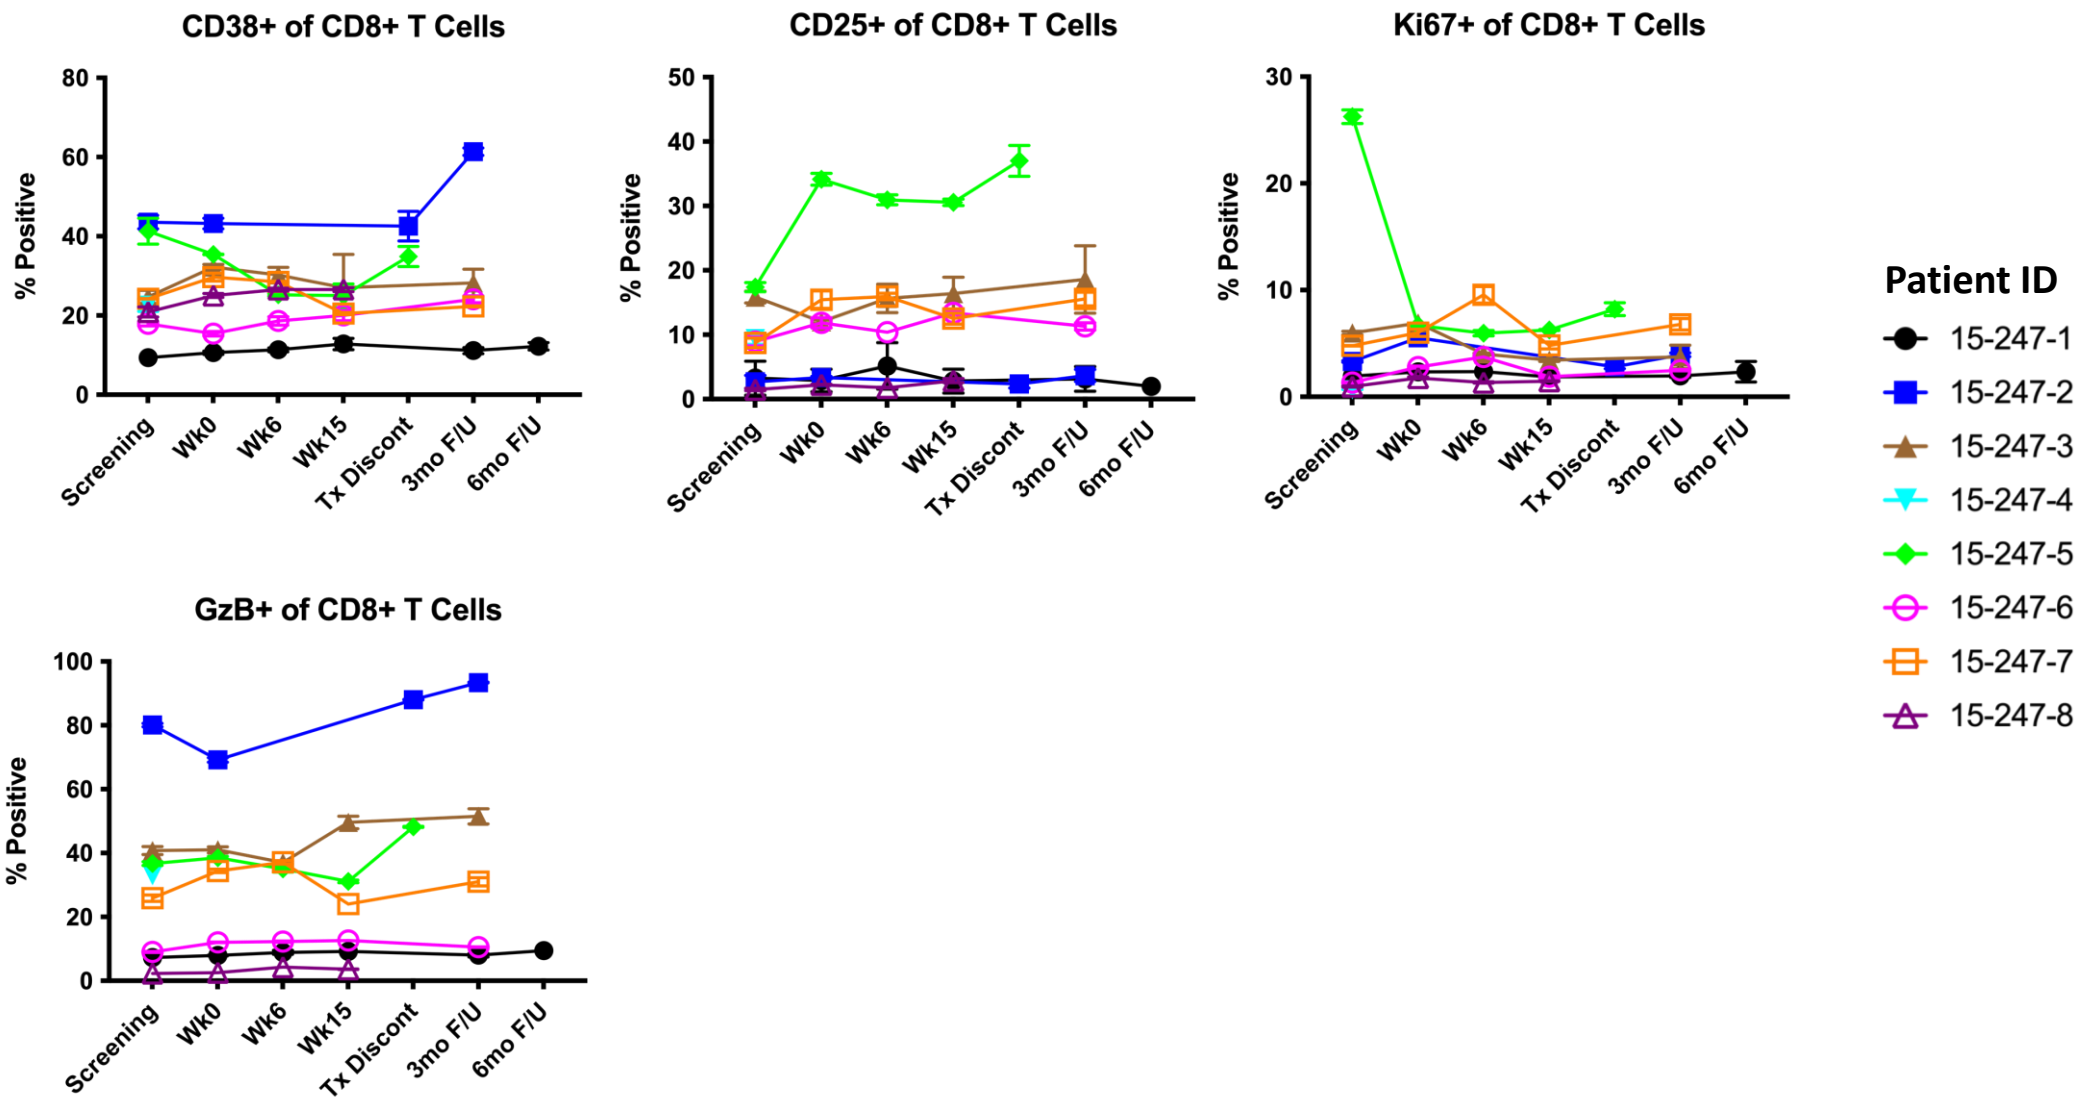

Figure S3: Summary of CD8+ cell subpopulation frequencies

GzB, Granzyme B

a.

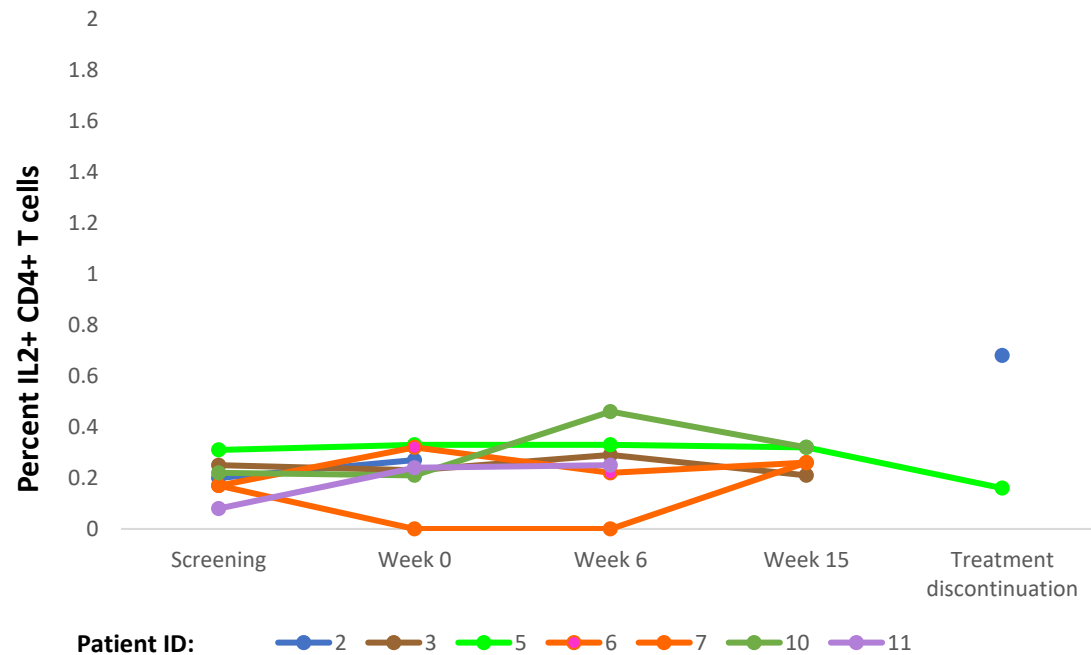

b.

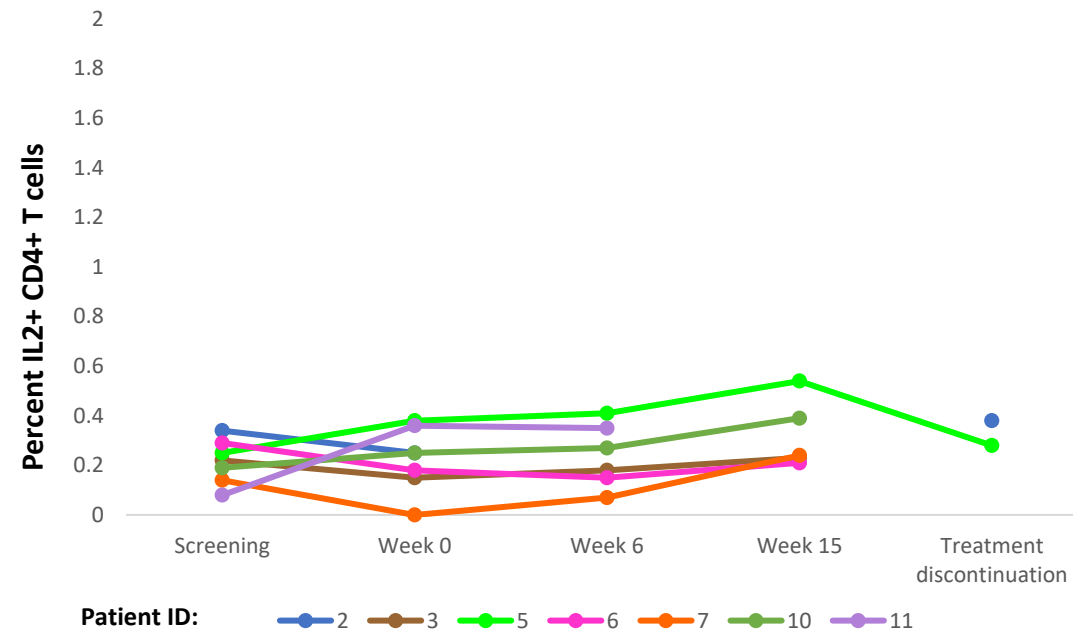

c.

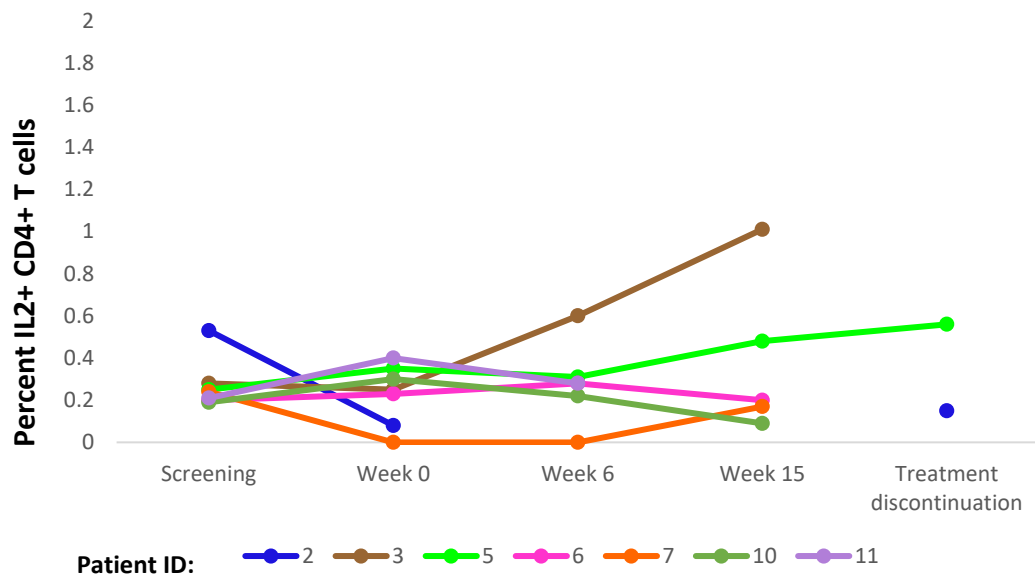

d.

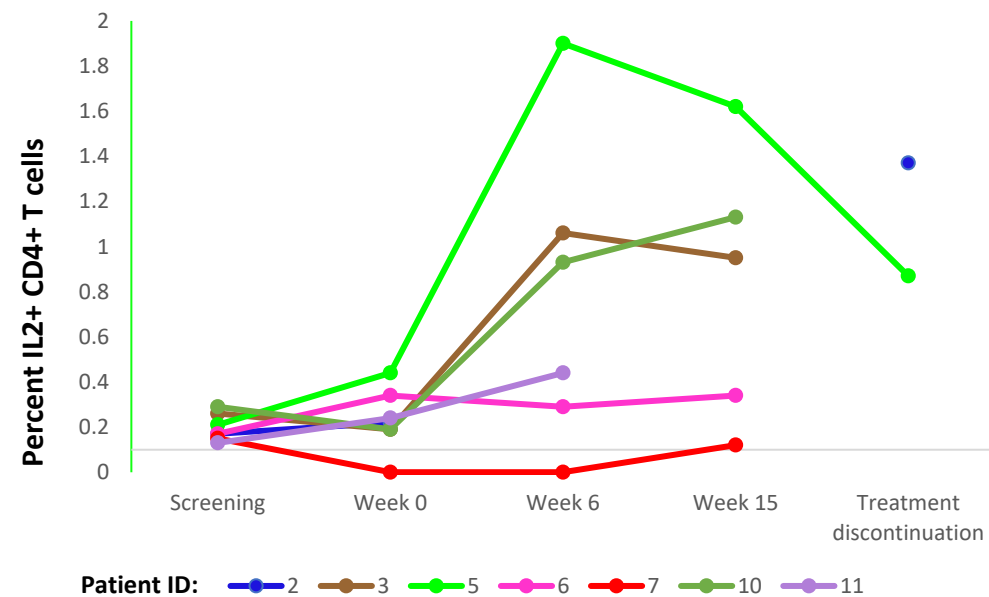

**Figure S4: Cytokine responses of CD4 T cells to test peptides.** (a) CD4 immune response against 122A in non-HLA2 patients (IL-2); (b) CD4 immune response against 122A1 in non-HLA2 patients (IL-2); (c) CD4 immune response against 427L in non-HLA2 patients (IL-2); (d) CD4 immune response against 331L in non-HLA2 patients (IL-2)

HLA, human leukocyte antigen; IL-2, interleukin 2

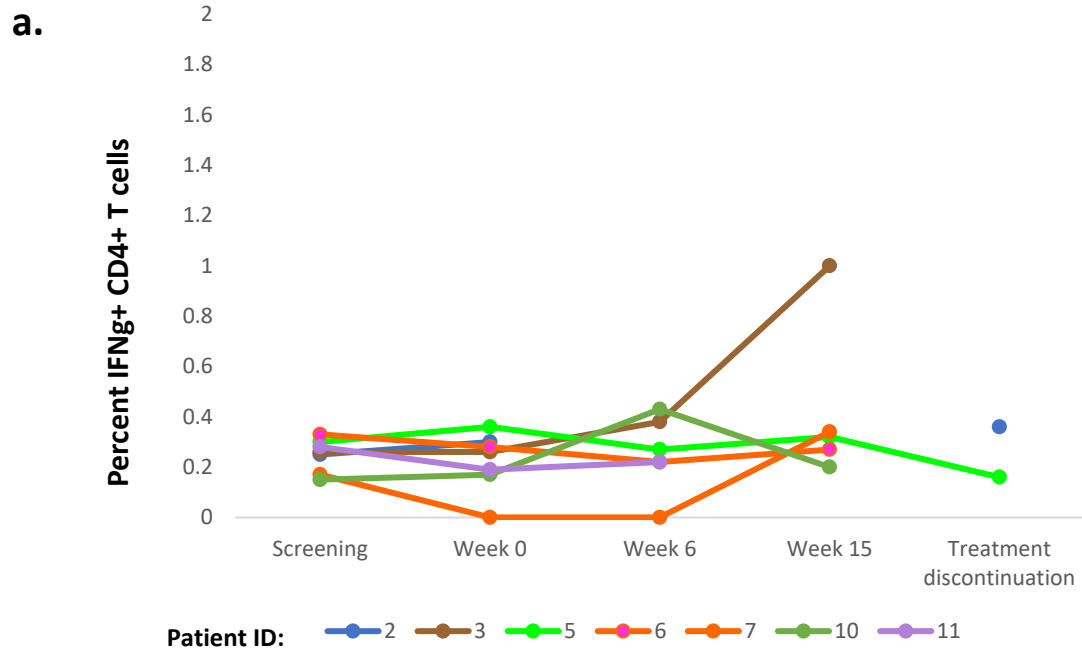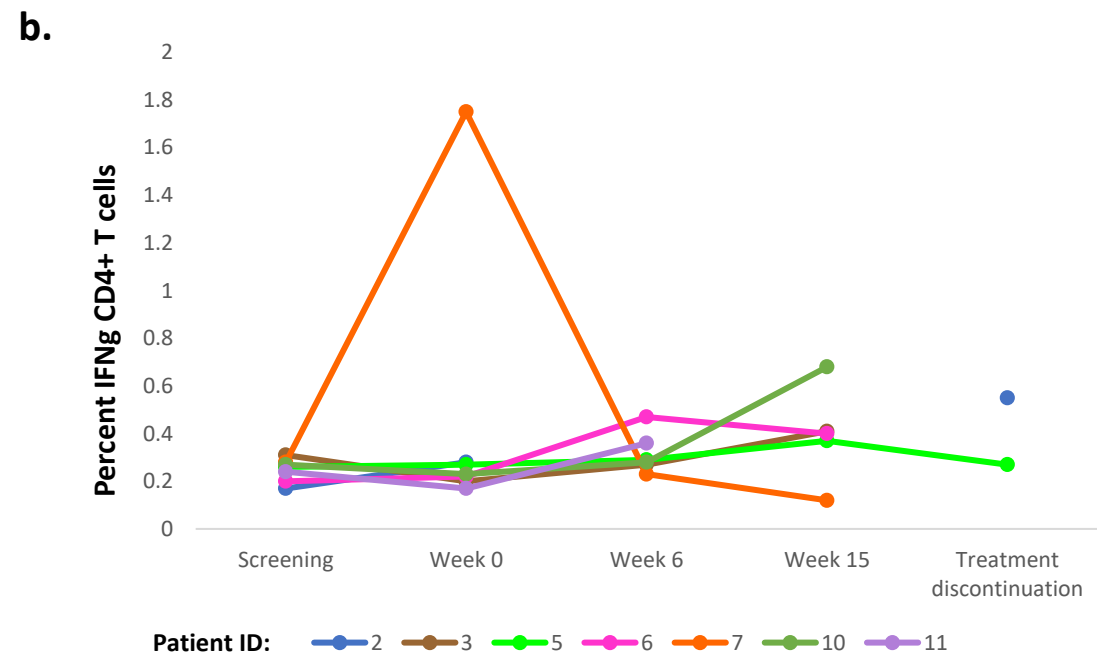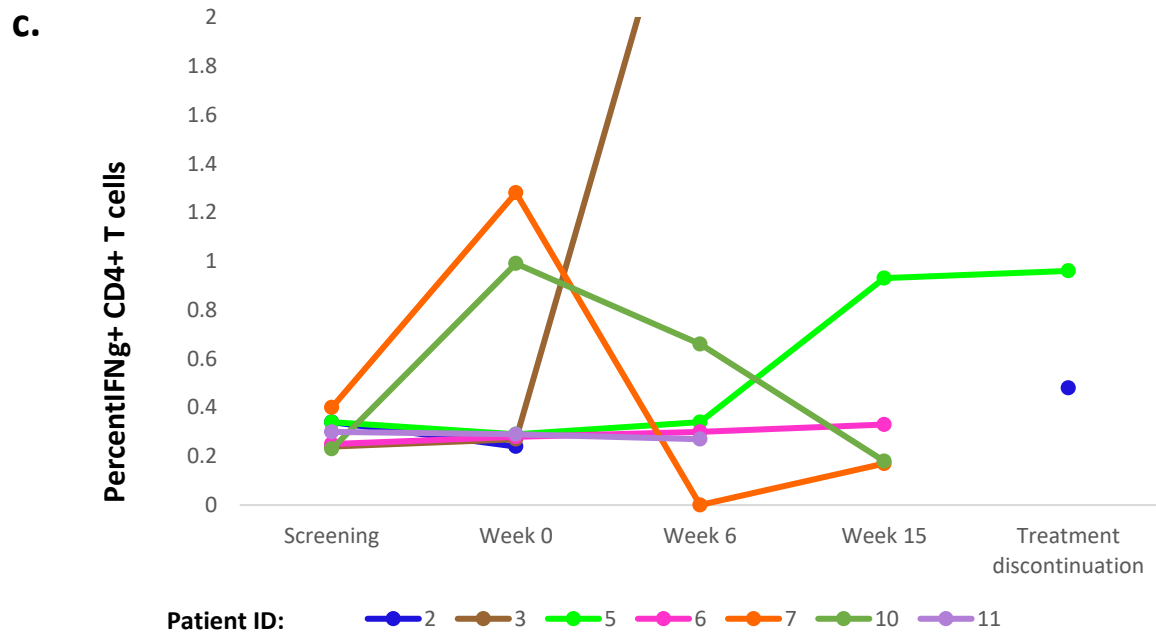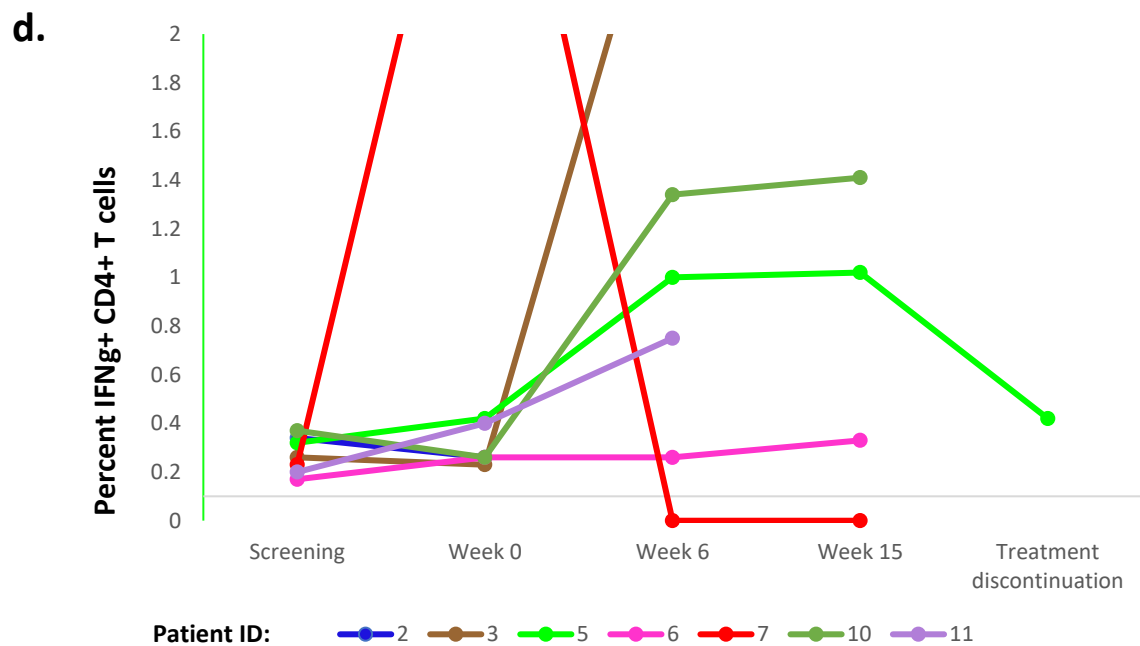

**Figure S5: Cytokine responses of CD4 T cells to test peptides.** (a) CD4 immune response against 122A in non-HLA2 patients (IFN $\gamma$ ); (b) CD4 immune response against 122A1 in non-HLA2 patients (IFN $\gamma$ ); (c) CD4 immune response against 427L in non-HLA2 patients (IFN $\gamma$ ); (d) CD4 immune response against 331L in non-HLA2 patients (IFN $\gamma$ )

HLA, human leukocyte antigen; IFN $\gamma$ , interferon gamma

a.

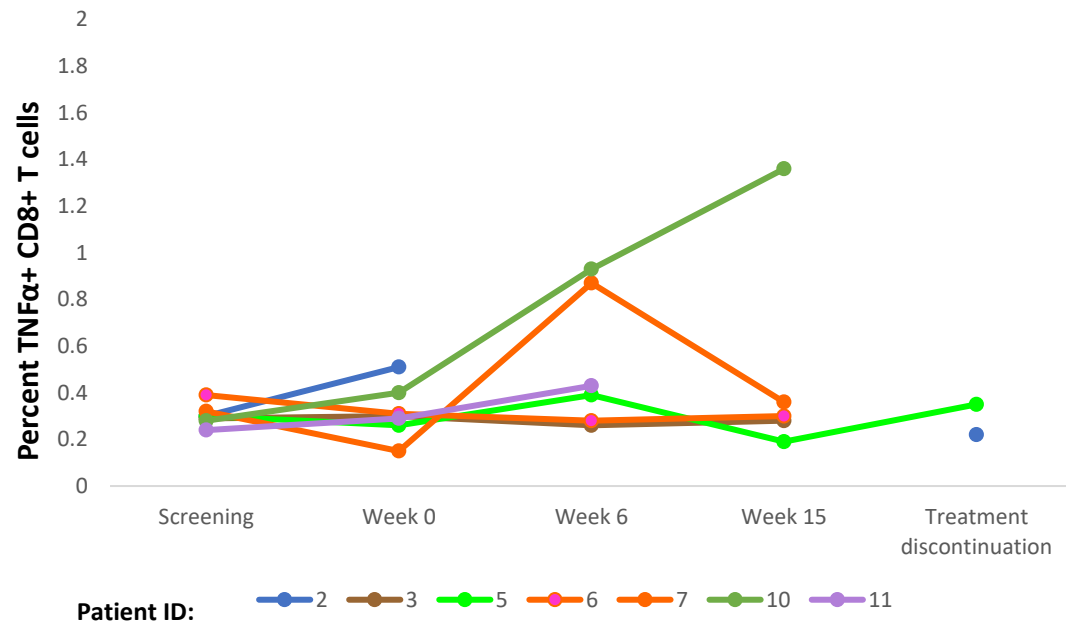

b.

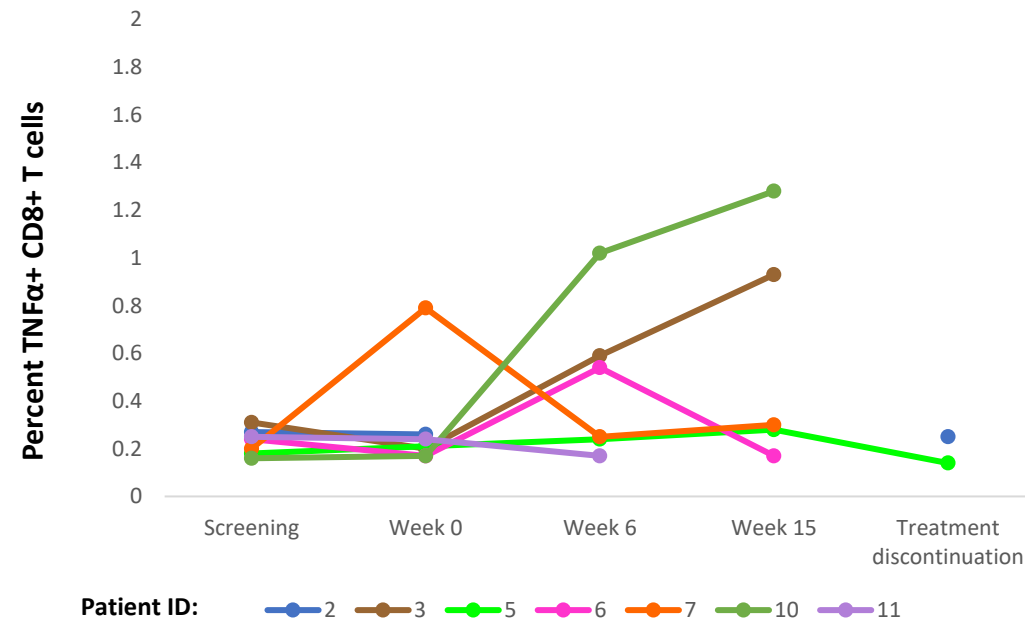

c.

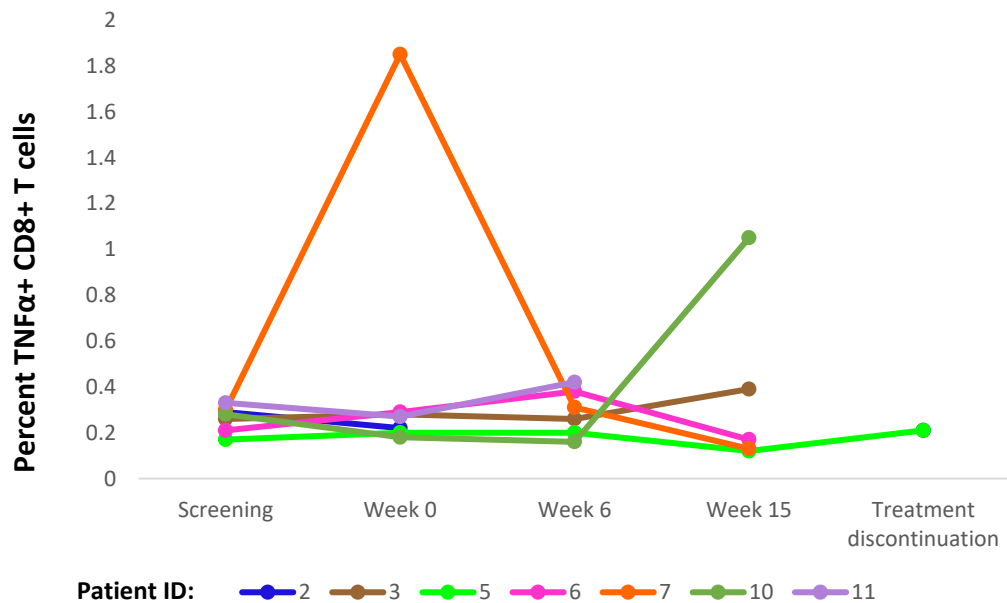

d.

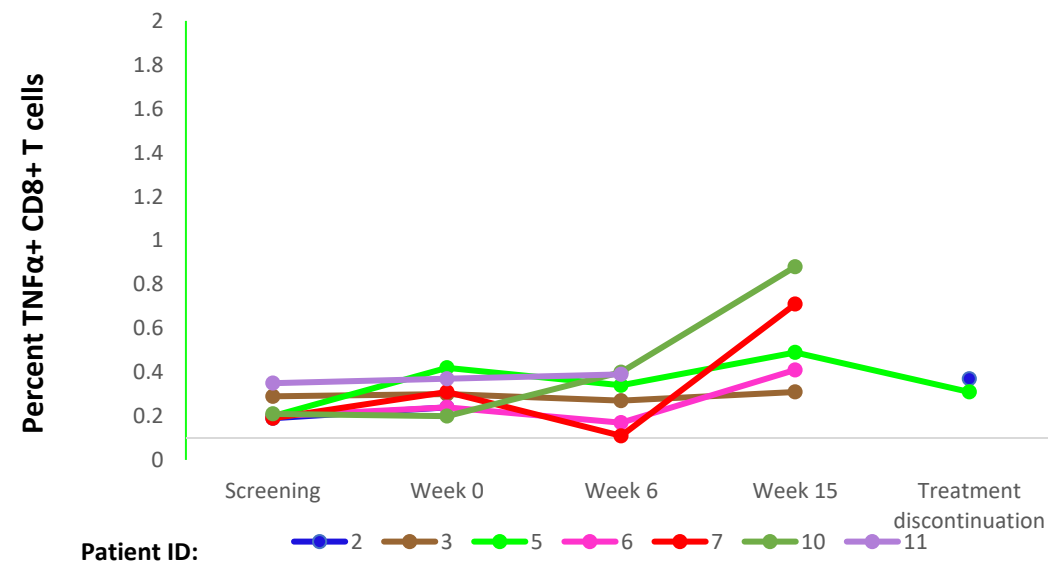



**Figure S6: Cytokine responses of CD8 T cells to test peptides.** (a) CD8 immune response against 122A in non-HLA2 patients (TNF $\alpha$ ); (b) CD8 immune response against 122A1 in non-HLA2 patients (TNF $\alpha$ ); (c) CD8 immune response against 427L in non-HLA2 patients (TNF $\alpha$ ); (d) CD8 immune response against 331L in non-HLA2 patients (TNF $\alpha$ )

HLA, human leukocyte antigen; TNF, tumor necrosis factor

a.

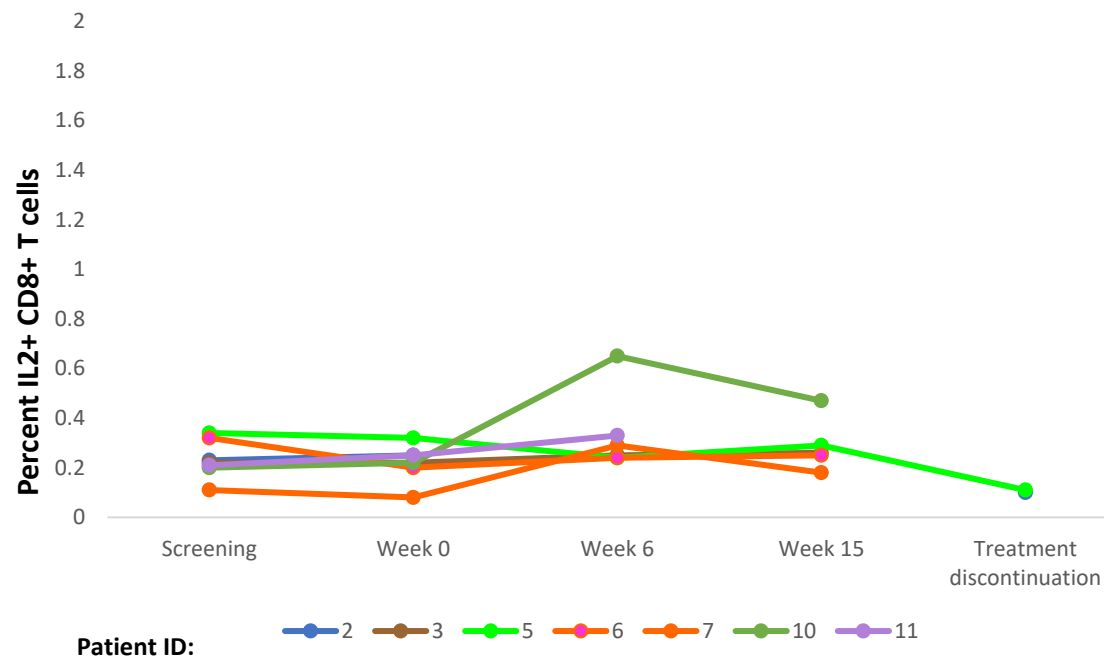

b.

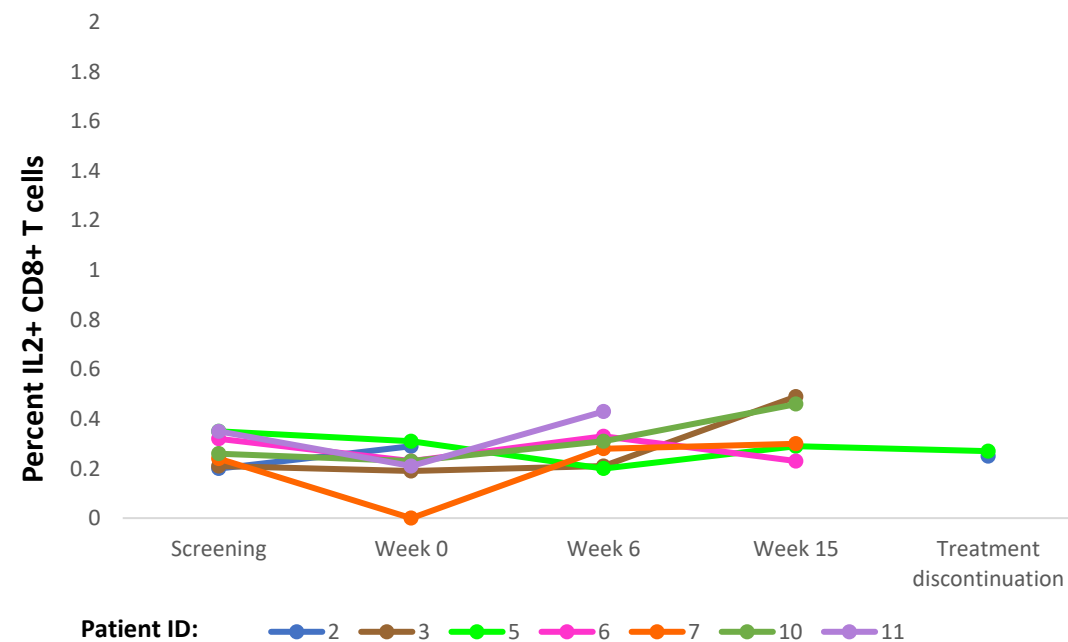

c.

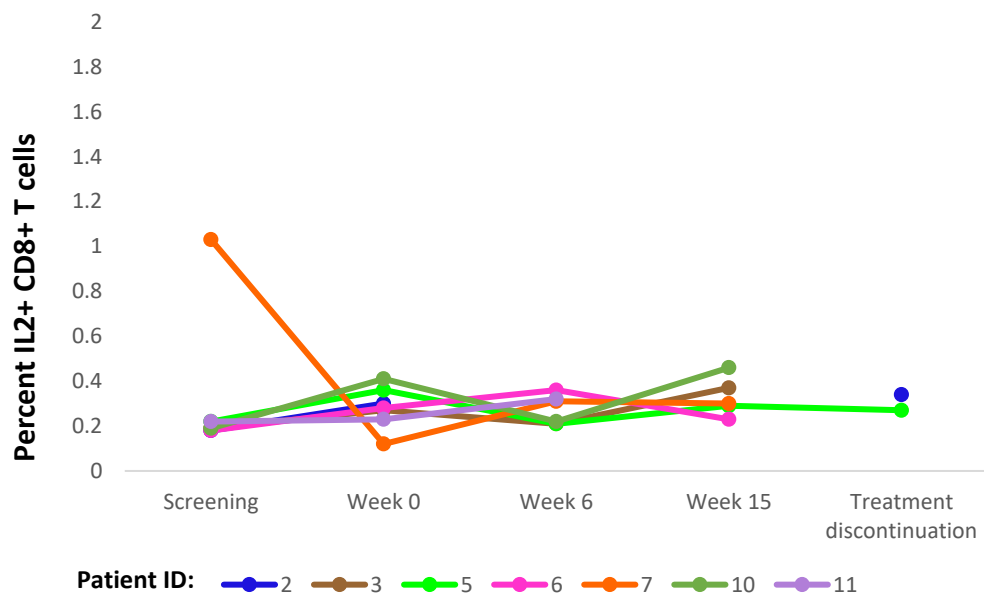

d.

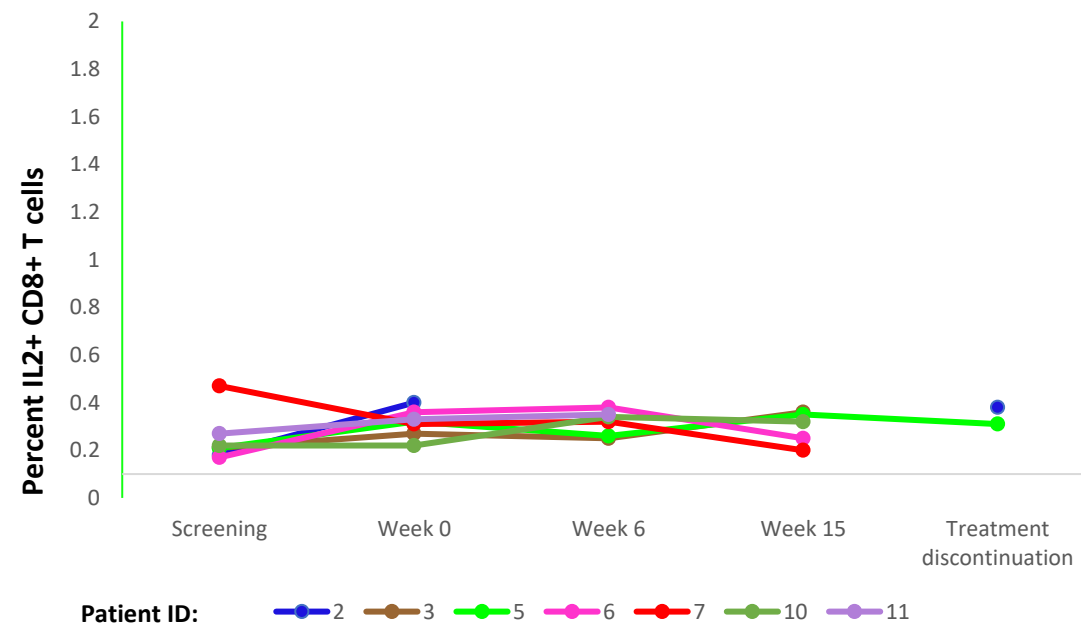

**Figure S7: Cytokine responses of CD8 T cells to test peptides.** (a) CD8 immune response against 122A in non-HLA2 patients (IL-2); (b) CD8 immune response against 122A1 in non-HLA2 patients (IL-2); (c) CD8 immune response against 427L in non-HLA2 patients (IL-2); (d) CD8 immune response against 331L in non-HLA2 patients (IL-2)

HLA, human leukocyte antigen; IL-2, interleukin 2

a.

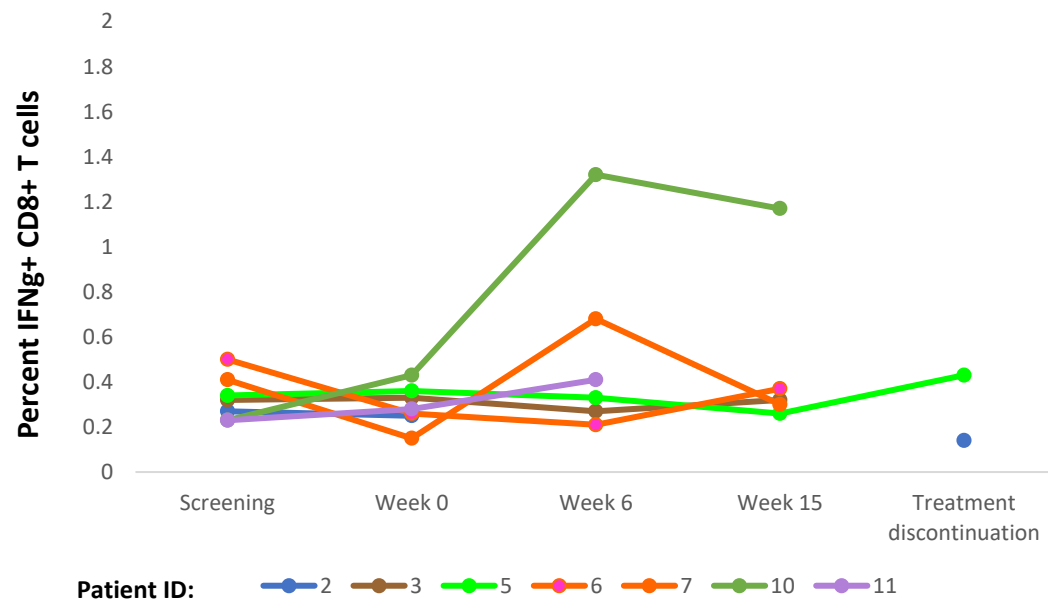

b.

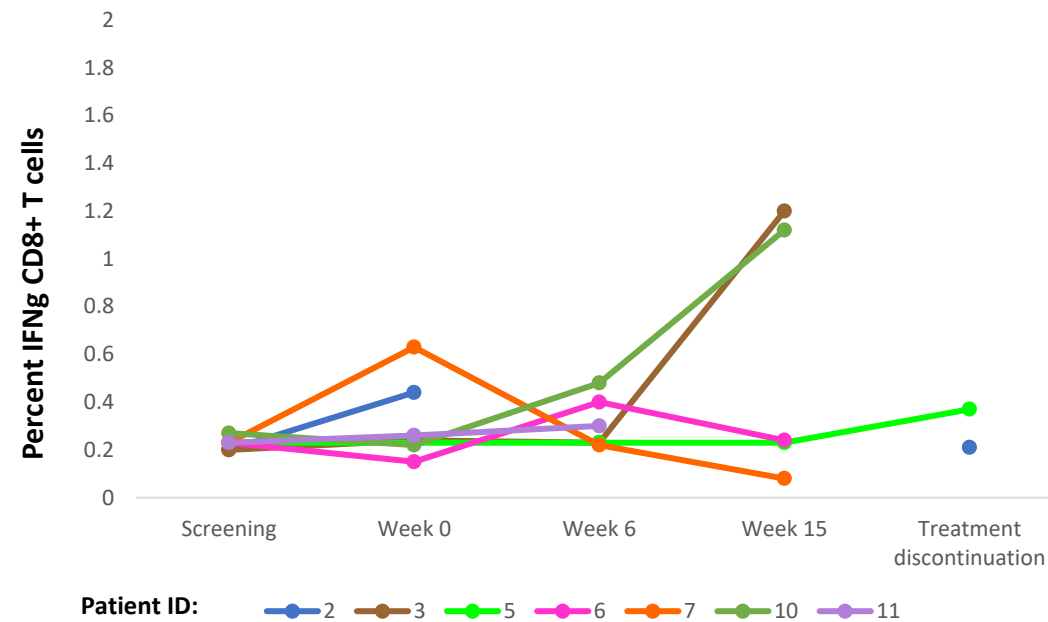

c.

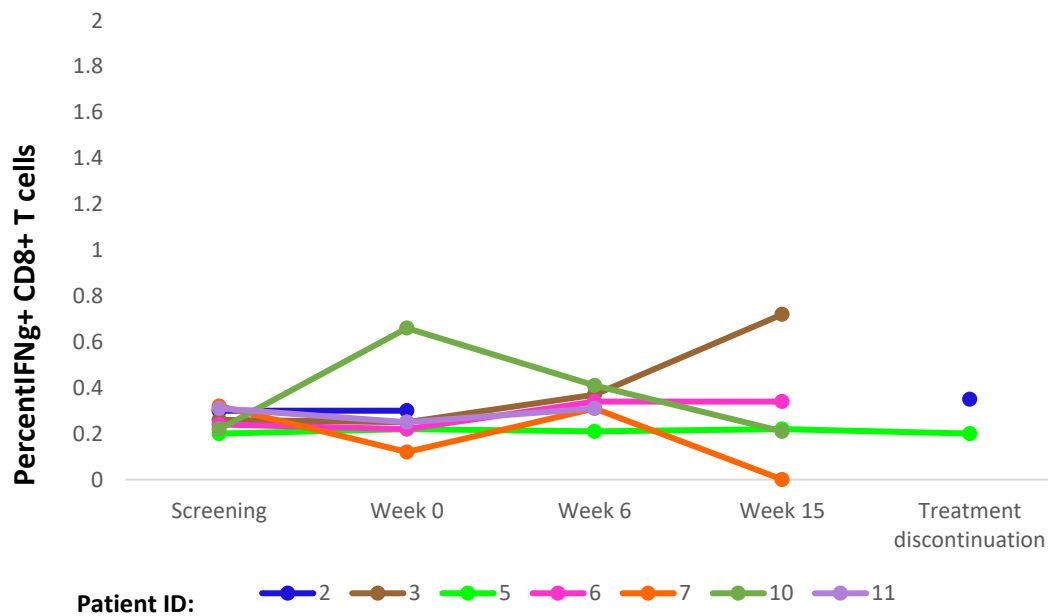

d.

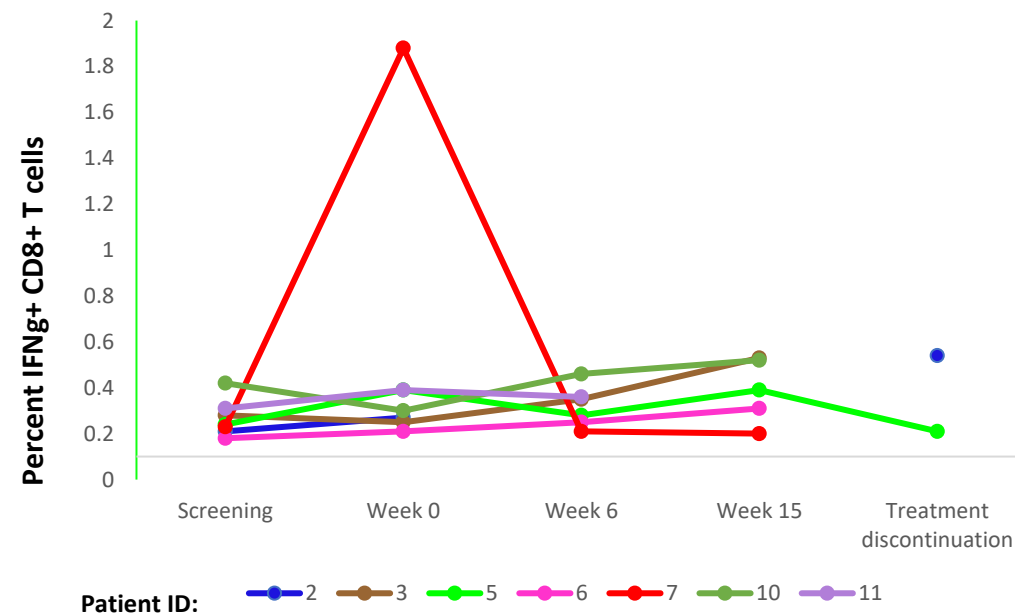

**Figure S8: Cytokine responses of CD8 T cells to test peptides.** (a) CD8 immune response against 122A in non-HLA2 patients (IFN $\gamma$ ); (b) CD8 immune response against 122A1 in non-HLA2 patients (IFN $\gamma$ ); (c) CD8 immune response against 427L in non-HLA2 patients (IFN $\gamma$ ); (d) CD8 immune response against 331L in non-HLA2 patients (IFN $\gamma$ )

HLA, human leukocyte antigen; IFN $\gamma$ , interferon gamma

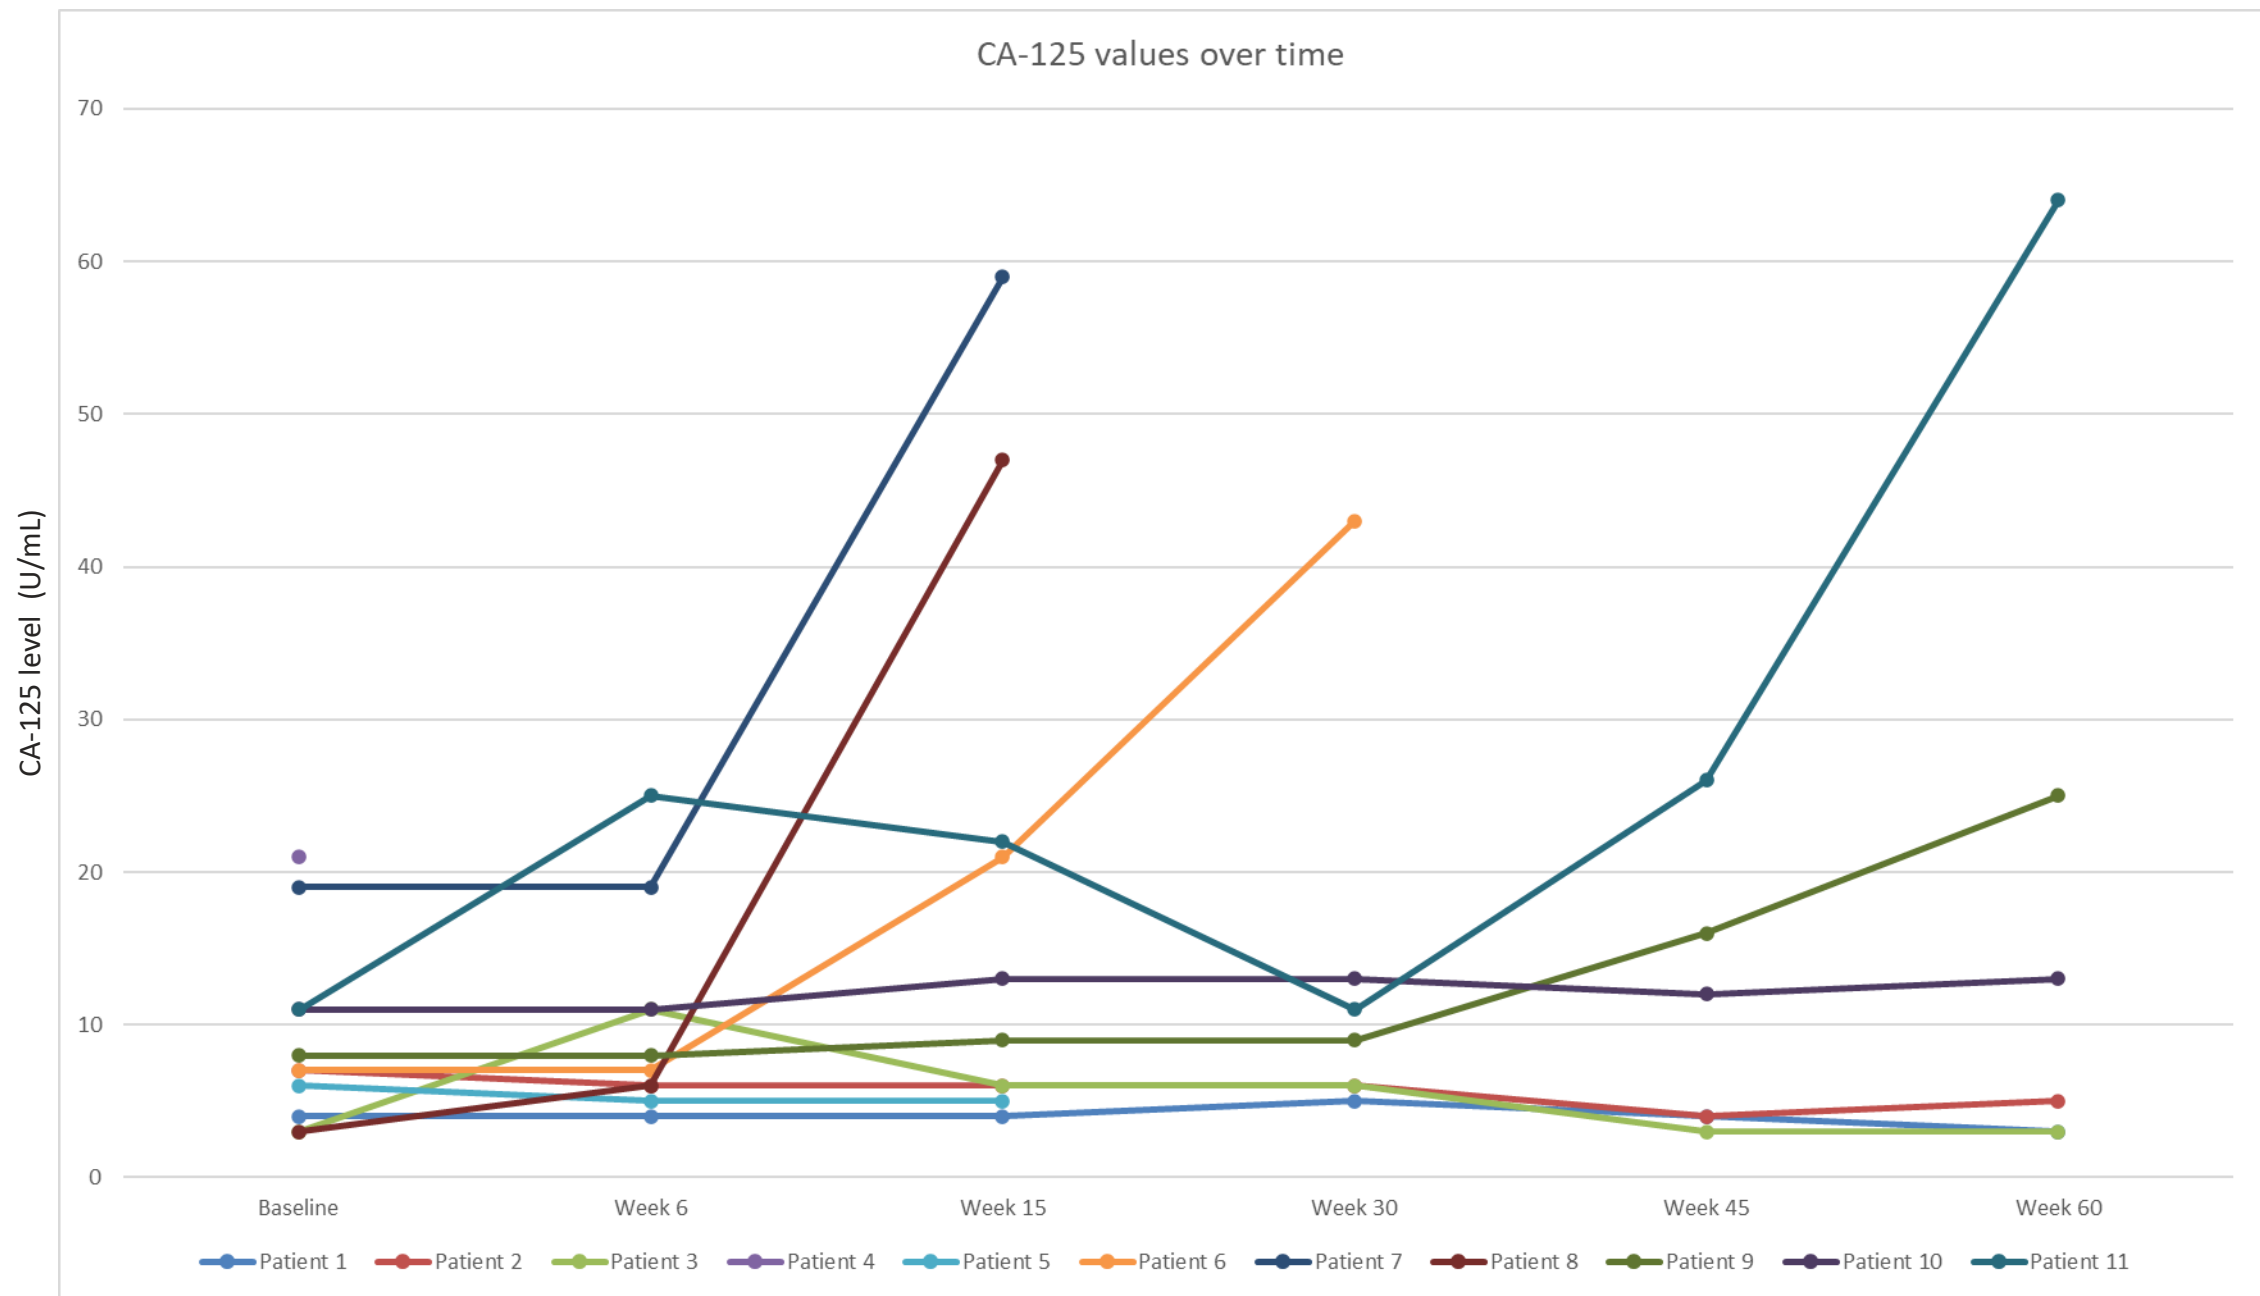

Figure S9: CA-125 responses

**Table S1: HLA typing results**

| Study ID | A                 | B               | C                    | DRB1              | DQB1           |
|----------|-------------------|-----------------|----------------------|-------------------|----------------|
| 1        | 02:01<br>30:01    | 41:01<br>45:01  | 17:MN<br>16:01       | 04:03<br>07:01    | 03:05<br>03:03 |
| 2        | 01:01<br>01:01    | 08:01<br>37:01  | 07:AJKDW<br>06:DDAR  | 03:01<br>10:01    | 02:01<br>05:01 |
| 3        | 24:02<br>31:01    | 35:08<br>38:01  | 04:AMEKR<br>12:AJUHH | 11:01<br>14:04    | 03:01<br>05:03 |
| 5        | 23:AFCTD<br>25:01 | 18:RRG<br>49:01 | 12:AJUHH<br>07:AJKDW | 15:01<br>16:01    | 06:02<br>05:02 |
| 6        | 11:01<br>33:03    | 15:01<br>44:03  | 14:03<br>04:AMEKR    | 04:06<br>13:02    | 03:02<br>06:04 |
| 7        | 03:01<br>03:01    | 08:01<br>35:01  | 07:01<br>04:01       | 01:01<br>03:01    | 05:01<br>02:01 |
| 8        | 02:01<br>30:02    | 15:10<br>42:01  | 03:04<br>17:01       | 13:03<br>14:54    | 03:01<br>05:03 |
| 9        | 02:01<br>32:01    | 14:01<br>35:08  | 08:02<br>04:01       | 07:01<br>11:04    | 02:02<br>03:01 |
| 10       | 01:01<br>01:01    | 35:02<br>52:01  | 06:02<br>12:02       | 11:04<br>15:02    | 03:01<br>06:01 |
| 11       | 24:02<br>24:02    | 27:05<br>35:02  | 07:01<br>04:01       | 11:04<br>14:54    | 03:01<br>05:03 |
| 12       | 02:01<br>11:01    | 44:03<br>52:01  | 16:01<br>12:02       | 07:01<br>15:AMKZA | 02:02<br>06:01 |
